# Supplementary material for: Anti-Obesity Effects of Marine Macroalgae Extract Caulerpa lentillifera in a Caenorhabditis elegans Model
Source: MDPI journal article supplement (doi:10.3390/md21110577), 2023-11-03
Supplement: s1 [file s1]

Supplementary data for Manuscript entitle  
**“Anti-obesity Effects of the Marine Macroalgae Extracts, *Caulerpa lentillifera*, in  
*Caenorhabditis elegans* Model”**

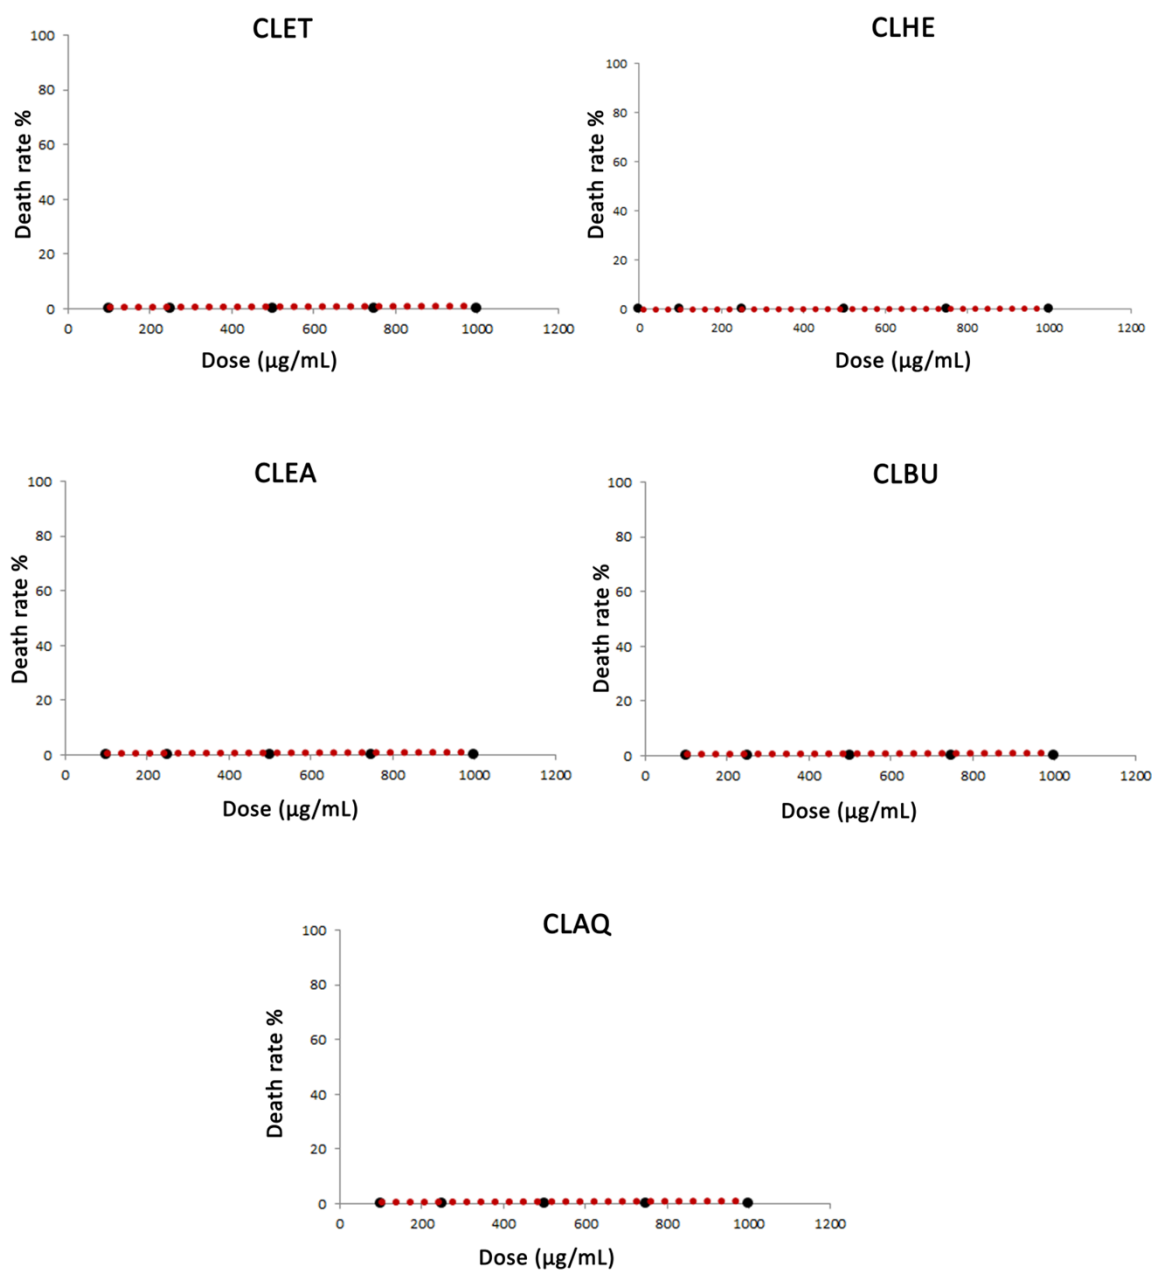

**Figure S1.** Toxicity of five fractions derived from *C. lentillifera* including ethanol (CLET), hexane (CLHE), ethyl acetate (CLEA), butanol (CLBU), and aqueous (CLAQ). The CL extracts at concentration of 100, 250, 500, 750, and 1000 µg/mL, showed 100% survival rates. This indicates that all fractions of CL extracts are non-toxic to *C. elegans*.

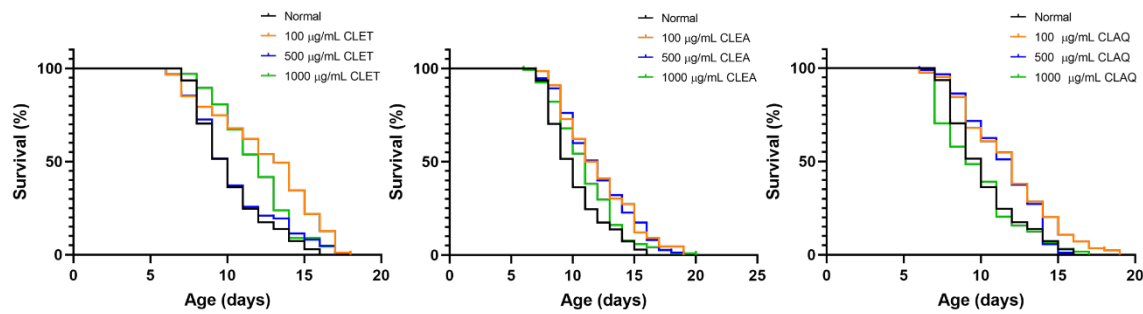

**Figure S2.** Effect of *C. lentillifera* extracts on the lifespan of *C. elegans* compared to the normal worms group.

**Table S1.** Mean lifespan, number of worms, and percentage of increase lifespan of wild type N2, 50 mM glucose-fed worms treated with 1% DMSO or *C. lentillifera* extracts.

| Strain               | Mean lifespan (days) | No. of worms | Increase in lifespan (%) | P value |
|----------------------|----------------------|--------------|--------------------------|---------|
| N2                   | 10.25 ± 2.54         | 115          |                          |         |
| N2 + 100 µg/mL CLET  | 12.39 ± 3.51         | 87           | 20.88                    | <0.0001 |
| N2 + 500 µg/mL CLET  | 10.34 ± 2.89         | 62           | 0.88                     | 0.9933  |
| N2 + 1000 µg/mL CLET | 11.76 ± 2.46         | 67           | 14.73                    | 0.0029  |
| N2 + 100 µg/mL CLEA  | 12.03 ± 3.06         | 66           | 17.37                    | 0.0002  |
| N2 + 500 µg/mL CLEA  | 11.95 ± 3.02         | 75           | 16.59                    | 0.0003  |
| N2 + 1000 µg/mL CLEA | 11.02 ± 2.68         | 118          | 7.51                     | 0.2012  |
| N2 + 100 µg/mL CLAQ  | 11.71 ± 3.06         | 84           | 14.24                    | 0.0016  |
| N2 + 500 µg/mL CLAQ  | 11.39 ± 2.38         | 88           | 11.12                    | 0.0259  |
| N2 + 1000 µg/mL CLAQ | 9.75 ± 2.66          | 64           | -4.88                    | 0.8699  |

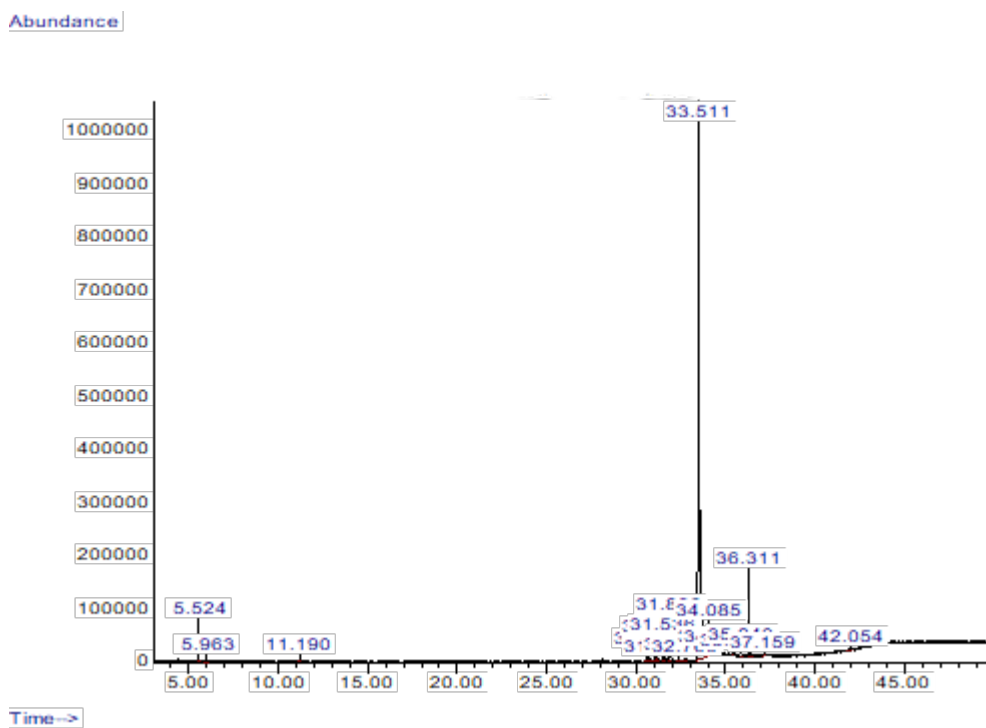

**Figure S3.** GC-MS Chromatogram of CLET. Three of the most abundant compounds include n-Hexadecanoic acid (69.76%), Butanoic acid, 3-methyl-, 3,7-dimethyl-6-octenyl ester (6.98%), and Hexadecanoic acid, ethyl ester (5.10%).

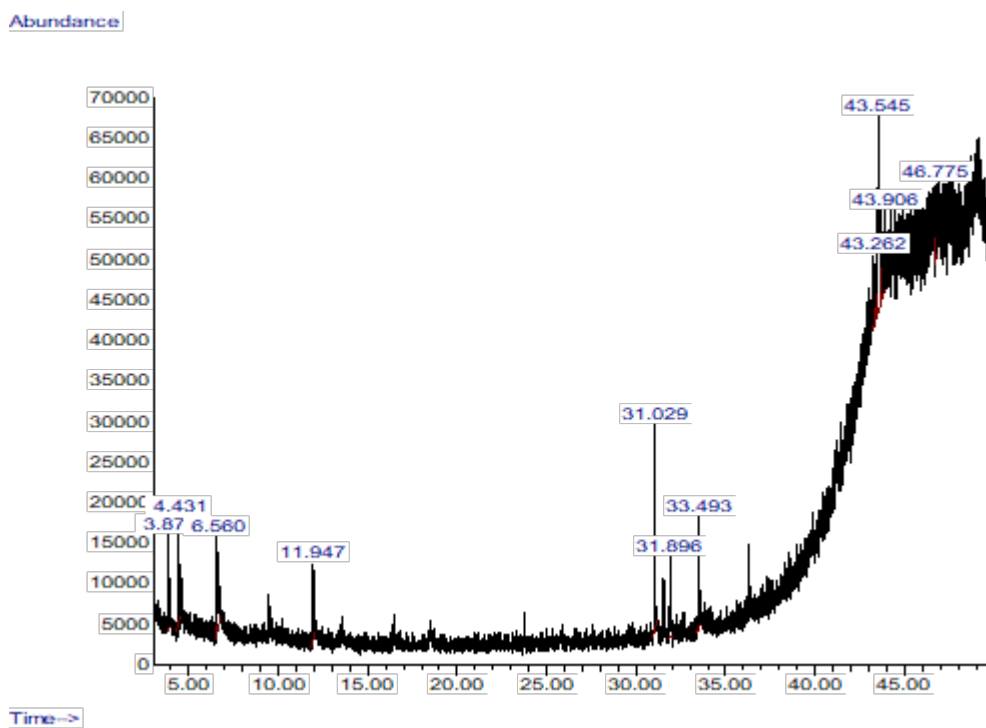

**Figure S4.** GC-MS Chromatogram of CLEA. Three of the most abundant compounds include dl-2-Phenyltryptophane (29.28%), Benzoic acid, 2,6-dimethyl- (13.79%), and 4,7-Methanoazulene, decahydro-1,4,9,9-tetramethyl- (13.30%).
